# Supplementary material for: Epitomics: Analysis of Plasma C9 Epitope Heterogeneity in the Plasma of Lung Cancer Patients and Control Subjects
Source: Int J Mol Sci. 2023 Sep 21;24(18):14359. doi: 10.3390/ijms241814359 (PMC10531758; doi:10.3390/ijms241814359)
Supplement: Supplementary file 1 [file ijms-24-14359-s001.zip]

Archive with 5 entries (5 files):
- Tornyi et al. Supplementary Table 1.xlsx
- Tornyi et al. Supplementary Table 2.xlsx
- Tornyi et al. Supplementary Table 3.xlsx
- Tornyi et al. SupplementaryTable  4.xlsx
- Tornyi et al._supplementary figures_v0920.pdf
