# Supplementary material for: Epitomics: Analysis of Plasma C9 Epitope Heterogeneity in the Plasma of Lung Cancer Patients and Control Subjects
Source: Int J Mol Sci. 2023 Sep 21;24(18):14359. doi: 10.3390/ijms241814359 (PMC10531758; doi:10.3390/ijms241814359)
Supplement: Supplementary file 1 [file ijms-24-14359-s001.zip › Tornyi et al. Supplementary Table 1.xlsx]

## Sheet: Table S1
BSI library	Bsi name	Peptide sequences
QuantiPlasma 300	Bsi0449	---NPLPALTFPDDN--
		---TPPPALEWNSRI--
		-----YPALLFPVDIRP
		---YPLPSNPSKETP--
		---SVPPALIFPEAL--
		--SSKQPAL--EDWLI-
		---TVANTLMTPPLP--
		---QHTPGLTFPPEI--
		QYDPVSPALMFP-----
		----APPALMFPPYSS-
		--YYQPPALWFASS---
		--AEFTQTKSFYNS---
QuantiPlasma 300	Bsi0581	IAGEY-TWRYY-TE
		FPDPMGTWRYF-Q-
		SVDPYATWRYR-L-
		--AVSGCRHAPSCT
		-NADQRCWEGR-CK
		-NCLYPCAGNM-LG
QuantiPlasma 300	Bsi0639	--ED--FIPYFTHLNY
		--MP-MYSALYTTPP-
		--LPPMYTPSYEHP--
		-GT--PREG-YHTMIS
		NSSP-VSLPLLTF---
		--VPPLYSSYHVPL--
		--MP-VMLPMYTDVA-
		TQQSGDWMPLLT----
		--LP-LAPHMVPYMT-
		-TMPMLSRAGMLA---
		YSKP--SAAQMTIL--
		--TDILRAPLYTGA--
		-GVSGPFDGGYLT---
