# Supplementary material for: Epitomics: Analysis of Plasma C9 Epitope Heterogeneity in the Plasma of Lung Cancer Patients and Control Subjects
Source: Int J Mol Sci. 2023 Sep 21;24(18):14359. doi: 10.3390/ijms241814359 (PMC10531758; doi:10.3390/ijms241814359)
Supplement: Supplementary file 1 [file ijms-24-14359-s001.zip › Tornyi et al. Supplementary Table 2.xlsx]

## Sheet: Epitopes _P-values
	BSI0449_1µl+BSI0449_biot	BSI0449_10µl+BSI0449_biot	BSI0449_1µl+BSI0581_biot	BSI0449_10µl+BSI0581_biot	BSI0449_1µl+BSI0639_biot	BSI0449_10µl+BSI0639_biot	BSA+BSI0449_biot	C9+BSI0449_biot
BSI0449_1µl+BSI0449_biot		0.0001974	7.688e-05	1.26e-05	2.23e-05	0.0001055	0.0001645	0.008822
BSI0449_10µl+BSI0449_biot			3.154e-10	1.102e-06	4.112e-06	3.568e-05	0.0001181	0.00481
BSI0449_1µl+BSI0581_biot				0.02836	0.005988	0.00439	4.46e-08	0.7898
BSI0449_10µl+BSI0581_biot					0.09774	0.01422	6.849e-06	0.3297
BSI0449_1µl+BSI0639_biot						0.1148	1.398e-05	0.1659
BSI0449_10µl+BSI0639_biot							5.049e-05	0.07924
BSA+BSI0449_biot								0.003907
C9+BSI0449_biot
	BSI0581_1µl+BSI0581_biot	BSI0581_10µl+BSI0581_biot	BSI0581_1µl+BSI0449_biot	BSI0581_10µl+BSI0449_biot	BSI0581_1µl+BSI0639_biot	BSI0581_10µl+BSI0639_biot	BSA+BSI0581_biot	C9+BSI0581_biot
BSI0581_1µl+BSI0581_biot		8.124e-05	0.004346	0.0001063	1.868e-06	0.0001135	9.811e-05	0.001322
BSI0581_10µl+BSI0581_biot			0.001322	2.029e-05	2.549e-06	7.768e-05	0.0006838	0.001225
BSI0581_1µl+BSI0449_biot				0.2351	0.002546	0.006891	0.002484	0.001413
BSI0581_10µl+BSI0449_biot					2.59e-05	0.001006	6.396e-05	0.001914
BSI0581_1µl+BSI0639_biot						0.09963	1.647e-05	0.03854
BSI0581_10µl+BSI0639_biot							0.0001146	0.009527
BSA+BSI0581_biot								0.001459
C9+BSI0581_biot
	BSI0639_1µl+BSI0639_biot	BSI0639_10µl+BSI0639_biot	BSI0639_1µl+BSI0449_biot	BSI0639_10µl+BSI0449_biot	BSI0639_1µl+BSI0581_biot	BSI0639_10µl+BSI0581_biot	BSA+BSI0639_biot	C9+BSI0639_biot
BSI0639_1µl+BSI0639_biot		1.011e-05	4.236e-06	1.36e-05	1.803e-07	4.688e-05	0.00414	2.241e-05
BSI0639_10µl+BSI0639_biot			2.088e-06	8.172e-09	2.19e-07	2.909e-05	0.06491	2.071e-05
BSI0639_1µl+BSI0449_biot				0.00593	0.0001577	0.02695	0.0001871	0.0006429
BSI0639_10µl+BSI0449_biot					4.998e-05	0.003544	0.008432	0.0006855
BSI0639_1µl+BSI0581_biot						0.0235	0.0002032	0.1695
BSI0639_10µl+BSI0581_biot							1.901e-05	0.007626
BSA+BSI0639_biot								9.744e-06
C9+BSI0639_biot

## Sheet: stat_description
	Data showed normal distribution (Shapiro-Wilk test).
	T-probe was performed with α = 0.05.
	Not significant vaules were highlighted with red.
