# Supplementary material for: Epitomics: Analysis of Plasma C9 Epitope Heterogeneity in the Plasma of Lung Cancer Patients and Control Subjects
Source: Int J Mol Sci. 2023 Sep 21;24(18):14359. doi: 10.3390/ijms241814359 (PMC10531758; doi:10.3390/ijms241814359)
Supplement: Supplementary file 1 [file ijms-24-14359-s001.zip › Tornyi et al. Supplementary Table 3.xlsx]

## Sheet: data
Num	Peptide	Peptide_acc	Times_Observed	Position_S	Position_E	%_db.system	BSI_449_NP/spall (37,7)	%_449_C	BSI_449_LCP/spall (38)	%_449_LC	BSI_581_NP/spall (40)	%_581_C	BSI_581_LCP/spall (37,7)	%_581_LC	BSI_639_NP/spall (36,3)	%_639_C	BSI_639_LCP/spall (29,2)	%_639_LC
1	ISILTAQYTTSYDPELTESSGSASHIDCR	PAp10492668	1	16	44	0.000205661	0	0	0	0	0	0	0	0	0	0	0	0
2	AQYTTSYDPELTESSGSASHIDCR	PAp06957524	7	21	44	0.00143963	0	0	0	0	0	0	0	0	0	0	0	0
3	QYTTSYDPELTESSGSASHIDCR	PAp01512840	488	22	44	0.100363	0	0	0	0	0	0	0	0	0	0	0	0
4	YTTSYDPELTESSGSASHIDCR	PAp01652914	108	23	44	0.0222114	0	0	0	0	0	0	0	0	0	0	0	0
5	TTSYDPELTESSGSASHIDCR	PAp05469548	6	24	44	0.00123397	0	0	0	0	0	0	0	0	0	0	0	0
6	TSYDPELTESSGSASHIDCR	PAp02144504	12	25	44	0.00246794	0	0	0	0	0	0	0	0	0	0	0	0
7	SYDPELTESSGSASHIDCR	PAp01654452	194	26	44	0.0398983	0	0	0	0	0	0	0	0	0	0	0	0
8	YDPELTESSGSASHIDCR	PAp00418529	320	27	44	0.0658117	0	0	0	0	0	0	0	0	0	0	0	0
9	DPELTESSGSASHIDCR	PAp04384296	43	28	44	0.00884344	0	0	0	0	0	0	0	0	0	0	0	0
10	PELTESSGSASHIDCR	PAp00556216	4630	29	44	0.952213	0	0	0	0	0	0	0	0	0	0	0	0
11	ELTESSGSASHIDCR	PAp07801419	1	30	44	0.000205661	0	0	0	0	0	0	0	0	0	0	0	0
12	LTESSGSASHIDCR	PAp04429863	2	31	44	0.000411323	0	0	0	0	0	0	0	0	0	0	0	0
13	TESSGSASHIDCR	PAp04533449	2	32	44	0.000411323	0	0	0	0	0	0	0	0	0	0	0	0
14	ESSGSASHIDCR	PAp01420097	2	33	44	0.000411323	0	0	0	0	0	0	0	0	0	0	0	0
15	SGSASHIDCR	PAp06396199	2	35	44	0.000411323	0	0	0	0	0	0	0	0	0	0	0	0
16	CRMSPWSEWSQCDPCLR	PAp07795834	5	43	59	0.00102831	0	0	0	0	0	0	0	0	0	0	0	0
17	RMSPWSEWSQCDPCLR	PAp01656886	7	44	59	0.00143963	0	0	0	0	0	0	0	0	0	0	0	0
18	MSPWSEWSQCDPCLR	PAp02130201	57	45	59	0.0117227	0	0	0	0	0	0	0	0	0	0	0	0
19	SEWSQCDPCLR	PAp05690063	4	49	59	0.000822646	0	0	0	0	0	0	0	0	0	0	0	0
20	EWSQCDPCLR	PAp07800563	5	50	59	0.00102831	0	0	0	0	0	0	0	0	0	0	0	0
21	SQCDPCLR	PAp02127955	1	52	59	0.000205661	0	0	0	0	0	0	0	0	0	0	0	0
22	QMFRSR	Sigma_1	0	60	65	0	0	0	0	0	0	0	0	0	0	0	0	0	*We found this peptide during C9 (Sigma) MS analysis. This frament was missing from PeptideAtlas database (2022-01 version)
23	SRSIEVFGQFNGKR	PAp00137234	196	64	77	0.0403096	3	1.21457	2	0.57971	2	0.611621	2	0.819672	0	0	0	0
24	SRSIEVFGQFNGK	PAp04664125	66	64	76	0.0135737	2	0.809717	2	0.57971	1	0.30581	0	0	0	0	0	0
25	SIEVFGQFNGKR	PAp00027763	17964	66	77	3.6945	12	4.8583	13	3.76812	9	2.75229	7	2.86885	6	4.7619	9	6.81818
26	SIEVFGQFNGK	PAp00045376	11595	66	76	2.38464	12	4.8583	13	3.76812	7	2.14067	7	2.86885	7	5.55556	7	5.30303
27	SIEVFGQFN	PAp05435898	18	66	74	0.00370191	0	0	0	0	0	0	0	0	0	0	0	0
28	SIEVFGQFNGKRCTDAVGDR	PAp06954551	3	66	85	0.000616984	0	0	0	0	0	0	0	0	0	0	0	0
29	SIEVFGQF	PAp05435940	3	66	73	0.000616984	0	0	0	0	0	0	0	0	0	0	0	0
30	SIEVFGQFNG	PAp04524537	1	66	75	0.000205661	0	0	0	0	0	0	0	0	0	0	0	0
31	IEVFGQFNGK	PAp04356342	24	67	76	0.00493587	0	0	0	0	0	0	0	0	0	0	0	0
32	EVFGQFNGKR	PAp02144728	14	68	77	0.00287926	0	0	0	0	0	0	0	0	0	0	0	0
33	EVFGQFNGK	PAp02128245	6	68	76	0.00123397	0	0	0	0	0	0	0	0	0	0	0	0
34	VFGQFNGKR	PAp06970313	1	69	77	0.000205661	0	0	0	0	0	0	0	0	0	0	0	0
35	VFGQFNGK	PAp04622839	1	69	76	0.000205661	0	0	0	0	0	0	0	0	0	0	0	0
36	VFGQFNGK	PAp04568766	2	70	76	0.000411323	0	0	0	0	0	0	0	0	0	0	0	0
37	FGQFNGKR	PAp05689089	1	70	77	0.000205661	0	0	0	0	0	0	0	0	0	0	0	0
38	KRCTDAVGDRRQCVPTEPCEDAEDDCGNDFQCSTGR	PAp05687277	1	76	111	0.000205661	0	0	0	0	0	0	0	0	0	0	0	0
39	RCTDAVGDR	PAp04420944	40	77	85	0.00822646	0	0	0	0	0	0	0	0	0	0	0	0
40	RCTDAVGDRR	PAp02127662	22	77	86	0.00452455	0	0	0	0	0	0	0	0	0	0	0	0
41	CTDAVGDRR	PAp00393377	924	78	86	0.190031	0	0	0	0	0	0	0	0	0	0	0	0
42	CTDAVGDR	PAp01363557	389	78	85	0.0800023	0	0	0	0	0	0	0	0	0	0	0	0
43	CTDAVGDRRQCVPTEPCEDAEDDCGNDFQCSTGR	PAp05474647	119	78	111	0.0244737	0	0	0	0	0	0	0	0	0	0	0	0
44	CTDAVGDRRQCVPTEPCEDAEDDCGNDFQCS	PAp10592068	1	78	108	0.000205661	0	0	0	0	0	0	0	0	0	0	0	0
45	GDRRQCVPTEPCEDAEDDCGNDFQCSTGR	PAp10590693	1	83	111	0.000205661	0	0	0	0	0	0	0	0	0	0	0	0
46	RQCVPTEPCEDAEDDCGNDFQCSTGR	PAp00045270	3932	86	111	0.808661	0	0	0	0	0	0	0	0	0	0	0	0
47	RQCVPTEPCEDAEDD	PAp02129872	7	86	100	0.00143963	0	0	0	0	0	0	0	0	0	0	0	0
48	RQCVPTEPCEDAED	PAp02129871	7	86	99	0.00143963	0	0	0	0	0	0	0	0	0	0	0	0
49	RQCVPTEPCED	PAp02146349	3	86	96	0.000616984	0	0	0	0	0	0	0	0	0	0	0	0
50	RQCVPTEPCEDAEDDCGNDFQC	PAp07804173	2	86	107	0.000411323	0	0	0	0	0	0	0	0	0	0	0	0
51	RQCVPTEPCE	PAp07137670	2	86	95	0.000411323	0	0	0	0	0	0	0	0	0	0	0	0
52	QCVPTEPCEDAEDDCGNDFQCSTGR	PAp00135145	11293	87	111	2.32253	0	0	0	0	0	0	0	0	0	0	0	0
53	QCVPTEPCEDAEDDCGNDFQCSTGRCIKM	PAp10486060	158	87	115	0.0324945	0	0	0	0	0	0	0	0	0	0	0	0
54	QCVPTEPCEDAEDDCGNDFQCSTGRCIK	PAp06550170	10	87	114	0.00205661	0	0	0	0	0	0	0	0	0	0	0	0
55	QCVPTEPCEDAEDDCGNDFQCSTGRCIKMR	PAp02146206	8	87	116	0.00164529	0	0	0	0	0	0	0	0	0	0	0	0
56	QCVPTEPCEDAEDD	PAp01655324	8	87	100	0.00164529	0	0	0	0	0	0	0	0	0	0	0	0
57	QCVPTEPCEDAED	PAp02139228	5	87	99	0.00102831	0	0	0	0	0	0	0	0	0	0	0	0
58	QCVPTEPCED	PAp05436689	4	87	96	0.000822646	0	0	0	0	0	0	0	0	0	0	0	0
59	QCVPTEPCEDA	PAp05684510	4	87	97	0.000822646	0	0	0	0	0	0	0	0	0	0	0	0
60	QCVPTEPCE	PAp07137718	3	87	95	0.000616984	0	0	0	0	0	0	0	0	0	0	0	0
61	QCVPTEPCEDAEDDCGNDFQC	PAp05687179	3	87	107	0.000616984	0	0	0	0	0	0	0	0	0	0	0	0
62	QCVPTEPCEDAE	PAp07137653	2	87	98	0.000411323	0	0	0	0	0	0	0	0	0	0	0	0
63	QCVPTEPCEDAEDDCGND	PAp02141564	2	87	104	0.000411323	0	0	0	0	0	0	0	0	0	0	0	0
64	QCVPTEPC	PAp05684846	1	87	94	0.000205661	0	0	0	0	0	0	0	0	0	0	0	0
65	QCVPTEPCEDAEDDCGNDFQCSTG	PAp04416584	1	87	110	0.000205661	0	0	0	0	0	0	0	0	0	0	0	0
66	QCVPTEPCEDAEDDCGN	PAp02144956	1	87	103	0.000205661	0	0	0	0	0	0	0	0	0	0	0	0
67	CVPTEPCEDAEDDCGNDFQCSTGR	PAp04428113	14	88	111	0.00287926	0	0	0	0	0	0	0	0	0	0	0	0
68	VPTEPCEDAEDDCGNDFQCSTGR	PAp10446535	2	89	111	0.000411323	0	0	0	0	0	0	0	0	0	0	0	0
69	PTEPCEDAEDDCGNDFQCSTGR	PAp00135673	510	90	111	0.104887	0	0	0	0	0	0	0	0	0	0	0	0
70	EPCEDAEDDCGNDFQCSTGR	PAp05688928	5	92	111	0.00102831	0	0	0	0	0	0	0	0	0	0	0	0
71	PCEDAEDDCGNDFQCSTGR	PAp00135674	301	93	111	0.0619041	0	0	0	0	0	0	0	0	0	0	0	0
72	CEDAEDDCGNDFQCSTGR	PAp06957382	1	94	111	0.000205661	0	0	0	0	0	0	0	0	0	0	0	0
73	EDAEDDCGNDFQCSTGR	PAp02128260	56	95	111	0.011517	0	0	0	0	0	0	0	0	0	0	0	0
74	DAEDDCGNDFQCSTGR	PAp05479831	5	96	111	0.00102831	0	0	0	0	0	0	0	0	0	0	0	0
75	AEDDCGNDFQCSTGR	PAp02128232	257	97	111	0.052855	0	0	0	0	0	0	0	0	0	0	0	0
76	EDDCGNDFQCSTGR	PAp02149097	2	98	111	0.000411323	0	0	0	0	0	0	0	0	0	0	0	0
77	DDCGNDFQCSTGR	PAp05480501	3	99	111	0.000616984	0	0	0	0	0	0	0	0	0	0	0	0
78	DCGNDFQCSTGR	PAp02149095	13	100	111	0.0026736	0	0	0	0	0	0	0	0	0	0	0	0
79	CGNDFQCSTGR	PAp02149050	8	101	111	0.00164529	0	0	0	0	0	0	0	0	0	0	0	0
80	GNDFQCSTGR	PAp06959015	1	102	111	0.000205661	0	0	0	0	0	0	0	0	0	0	0	0
81	CIKMRLR	Sigma_2	0	112	118	0	0	0	0	0	0	0	0	0	0		0	0	*We found this peptide during C9 (Sigma) MS analysis. This frament was missing from PeptideAtlas database (2022-01 version)
82	MRLRCNGDNDCGDFSDEDDCESEPRPPCR	PAp06958022	3	115	143	0.000616984	0	0	0	0	0	0	0	0	0	0	0	0
83	LRCNGDNDCGDFSDEDDCESEPRPPCR	PAp00393119	3492	117	143	0.71817	0	0	0	0	0	0	0	0	0	0	0	0
84	LRCNGDNDCGDFSDEDDCESEPRPPCRDR	PAp06389281	592	117	145	0.121752	0	0	0	0	0	0	0	0	0	0	0	0
85	LRCNGDNDCGDFSDEDD	PAp06959040	2	117	133	0.000411323	0	0	0	0	0	0	0	0	0	0	0	0
86	LRCNGDNDCGDFSDEDDCESEPRPPC	PAp07731210	1	117	142	0.000205661	0	0	0	0	0	0	0	0	0	0	0	0
87	LRCNGDNDCGDFSDEDDCESEPRPPCRD	PAp06957375	1	117	144	0.000205661	0	0	0	0	0	0	0	0	0	0	0	0
88	LRCNGDNDCGDFSD	PAp05480148	1	117	130	0.000205661	0	0	0	0	0	0	0	0	0	0	0	0
89	RCNGDNDCGDFSDEDDCESEPRPPCR	PAp04724185	42	118	143	0.00863778	0	0	0	0	0	0	0	0	0	0	0	0
90	CNGDNDCGDFSDEDDCESEPRPPCR	PAp00418518	21592	119	143	4.44064	0	0	0	0	0	0	0	0	0	0	0	0
91	CNGDNDCGDFSDEDDCESEPRPPCRDR	PAp00617276	822	119	145	0.169054	0	0	0	0	0	0	0	0	0	0	0	0
92	CNGDNDCGDFSDEDDCESEPRPPCRDRVVEESELAR	PAp06390077	26	119	154	0.0053472	0	0	0	0	0	0	0	0	0	0	0	0
93	CNGDNDCGDFSDEDDCESEPRPPCRD	PAp01654454	10	119	144	0.00205661	0	0	0	0	0	0	0	0	0	0	0	0
94	CNGDNDCGDFSDEDDCESEPRPPC	PAp03646647	4	119	142	0.000822646	0	0	0	0	0	0	0	0	0	0	0	0
95	CNGDNDCGDFSDEDDC	PAp04348771	2	119	134	0.000411323	0	0	0	0	0	0	0	0	0	0	0	0
96	CNGDNDCGDFSDE	PAp07137707	1	119	131	0.000205661	0	0	0	0	0	0	0	0	0	0	0	0
97	CNGDNDCGDFSDEDD	PAp04343048	1	119	133	0.000205661	0	0	0	0	0	0	0	0	0	0	0	0
98	NGDNDCGDFSDEDDCESEPRPPCR	PAp05656345	90	120	143	0.0185095	0	0	0	0	0	0	0	0	0	0	0	0
99	NGDNDCGDFSDEDDCESEPRPPCRDR	PAp10488965	4	120	145	0.000822646	0	0	0	0	0	0	0	0	0	0	0	0
100	GDNDCGDFSDEDDCESEPRPPCR	PAp01655403	86	121	143	0.0176869	0	0	0	0	0	0	0	0	0	0	0	0
101	DNDCGDFSDEDDCESEPRPPCR	PAp02128166	6	122	143	0.00123397	0	0	0	0	0	0	0	0	0	0	0	0
102	NDCGDFSDEDDCESEPRPPCR	PAp02127930	315	123	143	0.0647834	0	0	0	0	0	0	0	0	0	0	0	0
103	DCGDFSDEDDCESEPRPPCR	PAp03340353	31	124	143	0.0063755	0	0	0	0	0	0	0	0	0	0	0	0
104	CGDFSDEDDCESEPRPPCR	PAp01513023	57	125	143	0.0117227	0	0	0	0	0	0	0	0	0	0	0	0
105	GDFSDEDDCESEPRPPCR	PAp05689893	6	126	143	0.00123397	0	0	0	0	0	0	0	0	0	0	0	0
106	DFSDEDDCESEPRPPCR	PAp05684173	5	127	143	0.00102831	0	0	0	0	0	0	0	0	0	0	0	0
107	FSDEDDCESEPRPPCR	PAp02128176	131	128	143	0.0269416	0	0	0	0	0	0	0	0	0	0	0	0
108	SDEDDCESEPRPPCR	PAp02127927	17	129	143	0.00349624	0	0	0	0	0	0	0	0	0	0	0	0
109	DEDDCESEPRPPCR	PAp07798073	3	130	143	0.000616984	0	0	0	0	0	0	0	0	0	0	0	0
110	EDDCESEPRPPCR	PAp05480829	28	131	143	0.00575852	0	0	0	0	0	0	0	0	0	0	0	0
111	DCESEPRPPCR	PAp05684152	4	133	143	0.000822646	0	0	0	0	0	0	0	0	0	0	0	0
112	CESEPRPPCR	PAp05684150	1	134	143	0.000205661	0	0	0	0	0	0	0	0	0	0	0	0
113	DRVVEESELAR	PAp00134520	9653	144	154	1.98525	11	4.45344	11	3.18841	18	5.50459	15	6.14754	7	5.55556	6	4.54545
114	DRVVEESELART	PAp05480369	1	144	155	0.000205661	0	0	0	0	0	0	0	0	0	0	0	0
115	DRVVEESELA	PAp03339849	1	144	153	0.000205661	0	0	0	0	0	0	0	0	0	0	0	0
116	DRVVEESELARTAGYGINILGMDPLSTPFDNEFYNGLCNR	PAp08359026	1	144	183	0.000205661	0	0	0	0	0	0	0	0	0	0	0	0
117	RVVEESELAR	PAp02127933	428	145	154	0.0880231	0	0	0	0	0	0	0	0	0	0	0	0
118	VVEESELAR	PAp00045840	10326	146	154	2.12366	11	4.45344	25	7.24638	31	9.48012	22	9.01639	7	5.55556	12	9.09091
119	VVEESELA	PAp04416958	4	146	153	0.000822646	0	0	0	0	0	0	0	0	0	0	0	0
120	VVEESELART	PAp05480349	2	146	155	0.000411323	0	0	0	0	0	0	0	0	0	0	0	0
121	VVEESELARTAGYGINILGMDPLSTPFDNEFYNGLCNRDR	PAp10487093	1	146	185	0.000205661	0	0	0	0	0	0	0	0	0	0	0	0
122	RTAGYGINILGMDPLSTPFDNEFYNGLCNR	PAp02149055	6	154	183	0.00123397	0	0	0	0	0	0	0	0	0	0	0	0
123	TAGYGINILGMDPLSTPFDNEFYNGLCNR	PAp00135130	10422	155	183	2.1434	0	0	1	0.289855	0	0	0	0	0	0	0	0
124	TAGYGINILGMDPLSTPFDNEFYNGLCNRDR	PAp00445406	348	155	185	0.0715702	0	0	0	0	0	0	0	0	0	0	0	0
125	TAGYGINILGMD	PAp01512285	187	155	166	0.0384587	0	0	0	0	0	0	0	0	0	0	0	0
126	TAGYGINILGMDPL	PAp00060545	36	155	168	0.00740381	0	0	0	0	0	0	0	0	0	0	0	0
127	TAGYGINILGMDPLSTPFDN	PAp05684798	22	155	174	0.00452455	0	0	0	0	0	0	0	0	0	0	0	0
128	TAGYGINILGMDPLSTPFDNEFYNGLCNRD	PAp01654791	21	155	184	0.00431889	0	0	0	0	0	0	0	0	0	0	0	0
129	TAGYGINILGMDPLSTPFDNEFYN	PAp01655408	19	155	178	0.00390757	0	0	0	0	0	0	0	0	0	0	0	0
130	TAGYGINILGMDPLSTPFDNEF	PAp04576436	10	155	176	0.00205661	0	0	0	0	0	0	0	0	0	0	0	0
131	TAGYGINILGMDPLSTPFDNEFYNGLCN	PAp05680994	9	155	182	0.00185095	0	0	0	0	0	0	0	0	0	0	0	0
132	TAGYGINILGMDPLSTPFDNEFYNGL	PAp05680801	6	155	180	0.00123397	0	0	0	0	0	0	0	0	0	0	0	0
133	TAGYGINILGMDPLSTPFD	PAp04520237	5	155	173	0.00102831	0	0	0	0	0	0	0	0	0	0	0	0
134	TAGYGINILGMDPLSTPFDNE	PAp06392693	2	155	175	0.000411323	0	0	0	0	0	0	0	0	0	0	0	0
135	TAGYGINILGMDPLSTPFDNEFYNGLCNRDRDGNTLTYYR	PAp06959079	2	155	194	0.000411323	0	0	0	0	0	0	0	0	0	0	0	0
136	TAGYGINILGMDPLS	PAp10464155	1	155	169	0.000205661	0	0	0	0	0	0	0	0	0	0	0	0
137	TAGYGINILGMDPLSTPF	PAp04476160	1	155	172	0.000205661	0	0	0	0	0	0	0	0	0	0	0	0
138	TAGYGINILGMDPLSTPFDNEFYNGLCNRDRD	PAp06959101	1	155	186	0.000205661	0	0	0	0	0	0	0	0	0	0	0	0
139	AGYGINILGMDPLSTPFDNEFYNGLCNR	PAp02128170	155	156	183	0.0318775	0	0	0	0	0	0	0	0	0	0	0	0
140	GYGINILGMDPLSTPFDNEFYNGLCNR	PAp05480599	161	157	183	0.0331115	0	0	0	0	0	0	0	0	0	0	0	0
141	YGINILGMDPLSTPFDNEFYNGLCNR	PAp10465076	25	158	183	0.00514154	0	0	0	0	0	0	0	0	0	0	0	0
142	GINILGMDPLSTPFDNEFYNGLCNR	PAp00486080	67	159	183	0.0137793	0	0	0	0	0	0	0	0	0	0	0	0
143	ILGMDPLSTPFDNEFYNGLCNR	PAp01652958	195	162	183	0.040104	0	0	0	0	0	0	0	0	0	0	0	0
144	GMDPLSTPFDNEFYNGLCNR	PAp01657921	80	164	183	0.0164529	0	0	0	0	0	0	0	0	0	0	0	0
145	MDPLSTPFDNEFYNGLCNR	PAp02144575	9	165	183	0.00185095	0	0	0	0	0	0	0	0	0	0	0	0
146	DPLSTPFDNEFYNGLCNR	PAp01656732	750	166	183	0.154246	0	0	0	0	0	0	0	0	0	0	0	0
147	PLSTPFDNEFYNGLCNR	PAp01512754	14130	167	183	2.906	0	0	0	0	0	0	0	0	0	0	0	0
148	LSTPFDNEFYNGLCNR	PAp02127943	16	168	183	0.00329058	0	0	0	0	0	0	0	0	0	0	0	0
149	STPFDNEFYNGLCNR	PAp00486122	300	169	183	0.0616984	0	0	0	0	0	0	0	0	0	0	0	0
150	TPFDNEFYNGLCNR	PAp02127942	48	170	183	0.00987175	0	0	0	0	0	0	0	0	0	0	0	0
151	PFDNEFYNGLCNR	PAp01435248	81	171	183	0.0166586	0	0	0	0	0	0	0	0	0	0	0	0
152	FDNEFYNGLCNR	PAp02138963	9	172	183	0.00185095	0	0	0	0	0	0	0	0	0	0	0	0
153	DNEFYNGLCNR	PAp02128163	21	173	183	0.00431889	0	0	0	0	0	0	0	0	0	0	0	0
154	NEFYNGLCNR	PAp02127937	14	174	183	0.00287926	0	0	0	0	0	0	0	0	0	0	0	0
155	EFYNGLCNR	PAp05686434	5	175	183	0.00102831	0	0	0	0	0	0	0	0	0	0	0	0
156	DRDGNTLTYYR	PAp00043884	10362	184	194	2.13106	8	3.23887	10	2.89855	11	3.36391	11	4.5082	5	3.96825	6	4.54545
157	DRDGNTLTYYRRPWNVASLIYETK	PAp06955323	30	184	207	0.00616984	0	0	0	0	1	0.30581	1	0.409836	0	0	0	0
158	DRDGNTLTY	PAp02540163	7	184	192	0.00143963	0	0	0	0	0	0	0	0	0	0	0	0
159	DRDGNTLTYY	PAp01652982	7	184	193	0.00143963	0	0	0	0	0	0	0	0	0	0	0	0
160	RDGNTLTYYR	PAp02127961	119	185	194	0.0244737	0	0	0	0	0	0	0	0	0	0	0	0
161	DGNTLTYYR	PAp00134498	4311	186	194	0.886607	8	3.23887	14	4.05797	10	3.0581	11	4.5082	7	5.55556	7	5.30303
162	DGNTLTYYRRPWNVASLIYETKGEK	PAp06957434	20	186	210	0.00411323	0	0	0	0	0	0	0	0	0	0	0	0
163	DGNTLTYYRRPWNVASLIYETK	PAp06576724	12	186	207	0.00246794	3	1.21457	2	0.57971	3	0.917431	2	0.819672	0	0	0	0
164	DGNTLTYY	PAp05435868	1	186	193	0.000205661	0	0	0	0	0	0	0	0	0	0	0	0
165	GNTLTYYR	PAp02150043	3	187	194	0.000616984	0	0	0	0	0	0	0	0	0	0	0	0
166	RRPWNVASLIYETK	PAp05682672	6	194	207	0.00123397	0	0	0	0	0	0	0	0	0	0	0	0
167	RPWNVASLIYETK	PAp00027567	26886	195	207	5.52941	19	7.69231	24	6.95652	16	4.89297	15	6.14754	9	7.14286	9	6.81818
168	RPWNVASLIYETKG	PAp02127661	1707	195	208	0.351064	0	0	0	0	0	0	0	0	0	0	0	0
169	RPWNVASLIYETKGEK	PAp00027568	723	195	210	0.148693	8	3.23887	10	2.89855	11	3.36391	8	3.27869	6	4.7619	2	1.51515
170	RPWNVASLIYETKGEKNFR	PAp02146211	36	195	213	0.00740381	0	0	0	0	0	0	0	0	0	0	0	0
171	RPWNVASLIYET	PAp02149028	8	195	206	0.00164529	0	0	0	0	0	0	0	0	0	0	0	0
172	RPWNVASLIYETKGEKN	PAp02130079	7	195	211	0.00143963	0	0	0	0	0	0	0	0	0	0	0	0
173	RPWNVASLIYE	PAp05436046	1	195	205	0.000205661	0	0	0	0	0	0	0	0	0	0	0	0
174	PWNVASLIYETK	PAp02128102	61	196	207	0.0125453	0	0	0	0	0	0	0	0	0	0	0	0
175	WNVASLIYETK	PAp00094909	800	197	207	0.164529	0	0	0	0	0	0	0	0	0	0	0	0
176	NVASLIYETK	PAp00093719	882	198	207	0.181393	0	0	0	0	0	0	0	0	0	0	0	0
177	NVASLIYETKGEK	PAp02127966	7	198	210	0.00143963	0	0	0	0	0	0	0	0	0	0	0	0
178	VASLIYETK	PAp00148999	49	199	207	0.0100774	0	0	0	0	0	0	0	0	0	0	0	0
179	SLIYETK	PAp04639230	2	201	207	0.000411323	0	0	0	0	0	0	0	0	0	0	0	0
180	GEKNFRTEHYEEQIEAFK	PAp00138364	320	208	225	0.0658117	1	0.404858	4	1.15942	4	1.22324	4	1.63934	0	0	0	0
181	NFRTEHYEEQIEAFK	PAp00445315	2591	211	225	0.532869	6	2.42915	8	2.31884	8	2.44648	9	3.68852	3	2.38095	5	3.78788
182	NFRTEHYEEQIEAFKSIIQEK	PAp02128138	222	211	231	0.0456568	6	2.42915	15	4.34783	21	6.42202	22	9.01639	5	3.96825	10	7.57576
183	FRTEHYEEQIEAFK	PAp02128639	49	212	225	0.0100774	0	0	0	0	0	0	0	0	0	0	0	0
184	RTEHYEEQIEAFK	PAp02146034	8	213	225	0.00164529	0	0	0	0	0	0	0	0	0	0	0	0
185	RTEHYEEQIEAFKSIIQEK	PAp07796297	1	213	231	0.000205661	0	0	0	0	0	0	0	0	0	0	0	0
186	TEHYEEQIEAFK	PAp00028046	26009	214	225	5.34905	18	7.28745	22	6.37681	23	7.03364	22	9.01639	10	7.93651	12	9.09091
187	TEHYEEQIEAFKSIIQEK	PAp00028047	1538	214	231	0.316307	12	4.8583	13	3.76812	12	3.66972	12	4.91803	6	4.7619	6	4.54545
188	TEHYEEQIEAFKSIIQEKTSNFNAAISLK	PAp02145936	35	214	242	0.00719815	2	0.809717	7	2.02899	6	1.83486	1	0.409836	2	1.5873	0	0
189	TEHYEEQIEAF	PAp01655963	9	214	224	0.00185095	0	0	0	0	0	0	0	0	0	0	0	0
190	TEHYEEQIEA	PAp04356266	4	214	223	0.000822646	0	0	0	0	0	0	0	0	0	0	0	0
191	TEHYEEQIEAFKSI	PAp05680873	3	214	227	0.000616984	0	0	0	0	0	0	0	0	0	0	0	0
192	TEHYEEQIEAFKSIIQEKTSN	PAp06959077	1	214	234	0.000205661	0	0	0	0	0	0	0	0	0	0	0	0
193	TEHYEEQIEAFKSIIQEKT	PAp07802432	1	214	232	0.000205661	0	0	0	0	0	0	0	0	0	0	0	0
194	TEHYEEQIE	PAp04614105	1	214	222	0.000205661	0	0	0	0	0	0	0	0	0	0	0	0
195	TEHYEEQIEAFKS	PAp05685517	1	214	226	0.000205661	0	0	0	0	0	0	0	0	0	0	0	0
196	EHYEEQIEAFK	PAp01264749	19	215	225	0.00390757	0	0	0	0	0	0	0	0	0	0	0	0
197	HYEEQIEAFK	PAp03340348	124	216	225	0.025502	0	0	0	0	0	0	0	0	0	0	0	0
198	YEEQIEAFK	PAp04356586	11	217	225	0.00226228	0	0	0	0	0	0	0	0	0	0	0	0
199	YEEQIEAFKSIIQEK	PAp07799551	3	217	231	0.000616984	0	0	0	0	0	0	0	0	0	0	0	0
200	EEQIEAFKSIIQEK	PAp07800463	3	218	231	0.000616984	0	0	0	0	0	0	0	0	0	0	0	0
201	SIIQEKTSNFNAAISLK	PAp02127686	154	226	242	0.0316719	4	1.61943	5	1.44928	3	0.917431	2	0.819672	0	0	0	0
202	SIIQEKTSNFNAAISLKFTPTETNK	PAp02128270	51	226	250	0.0104887	0	0	0	0	1	0.30581	0	0	0	0	0	0
203	KTSNFNAAISLK	PAp04714198	2	231	242	0.000411323	0	0	0	0	0	0	0	0	0	0	0	0
204	TSNFNAAISLK	PAp00028217	15254	232	242	3.13716	10	4.04858	16	4.63768	15	4.58716	9	3.68852	5	3.96825	5	3.78788
205	TSNFNAAISLKFTPTETNK	PAp02127681	179	232	250	0.0368134	1	0.404858	2	0.57971	2	0.611621	0	0	0	0	0	0
206	TSNFNAAISLKFTPTETNKAEQCCEETASSISLHGK	PAp02144558	59	232	267	0.012134	0	0	0	0	0	0	0	0	0	0	0	0
207	TSNFNAAISL	PAp04559563	1	232	241	0.000205661	0	0	0	0	0	0	0	0	0	0	0	0
208	SNFNAAISLK	PAp00556776	4	233	242	0.000822646	0	0	0	0	0	0	0	0	0	0	0	0
209	NFNAAISLK	PAp06394491	2	234	242	0.000411323	0	0	0	0	0	0	0	0	0	0	0	0
210	FNAAISLK	PAp05452764	8	235	242	0.00164529	0	0	0	0	0	0	0	0	0	0	0	0
211	NAAISLK	PAp05683291	2	236	242	0.000411323	0	0	0	0	0	0	0	0	0	0	0	0
212	KFTPTETNKAEQCCEETASSISLHGK	PAp02146249	7	242	267	0.00143963	0	0	0	0	0	0	0	0	0	0	0	0
213	KFTPTETNK	PAp04704496	2	242	250	0.000411323	0	0	0	0	0	0	0	0	0	0	0	0
214	FTPTETNKAEQCCEETASSISLHGK	PAp00044178	18038	243	267	3.70972	4	1.61943	4	1.15942	8	2.44648	4	1.63934	2	1.5873	2	1.51515
215	FTPTETNKAEQCCEETASSISLHGKG	PAp02128131	2026	243	268	0.41667	0	0	0	0	0	0	0	0	0	0	0	0
216	FTPTETNK	PAp01049371	987	243	250	0.202988	0	0	0	0	0	0	0	0	0	0	0	0
217	FTPTETNKAEQCCEETASSISLH	PAp01651751	89	243	265	0.0183039	0	0	0	0	0	0	0	0	0	0	0	0
218	FTPTETNKAEQCCEETASSISLHGKGSFR	PAp02130098	63	243	271	0.0129567	0	0	0	0	0	0	0	0	0	0	0	0
219	FTPTETNKAEQCCEETASSISLHG	PAp02138658	45	243	266	0.00925477	0	0	0	0	0	0	0	0	0	0	0	0
220	FTPTETNKAEQCC	PAp02129525	19	243	255	0.00390757	0	0	0	0	0	0	0	0	0	0	0	0
221	FTPTETNKAEQC	PAp01655946	14	243	254	0.00287926	0	0	0	0	0	0	0	0	0	0	0	0
222	FTPTETNKAEQCCEETA	PAp02128310	12	243	259	0.00246794	0	0	0	0	0	0	0	0	0	0	0	0
223	FTPTETNKAEQCCEETAS	PAp02129529	11	243	260	0.00226228	0	0	0	0	0	0	0	0	0	0	0	0
224	FTPTETNKAEQCCE	PAp02129526	11	243	256	0.00226228	0	0	0	0	0	0	0	0	0	0	0	0
225	FTPTETNKAEQCCEETASSI	PAp01652810	7	243	262	0.00143963	0	0	0	0	0	0	0	0	0	0	0	0
226	FTPTETNKAEQCCEE	PAp02129532	2	243	257	0.000411323	0	0	0	0	0	0	0	0	0	0	0	0
227	FTPTETNKAEQCCEETASS	PAp05480618	2	243	261	0.000411323	0	0	0	0	0	0	0	0	0	0	0	0
228	FTPTETNKA	PAp05682079	2	243	251	0.000411323	0	0	0	0	0	0	0	0	0	0	0	0
229	FTPTETNKAEQCCEETASSISL	PAp06958023	1	243	264	0.000205661	0	0	0	0	0	0	0	0	0	0	0	0
230	FTPTETNKAEQCCEETASSISLHGKGS	PAp05683467	1	243	269	0.000205661	0	0	0	0	0	0	0	0	0	0	0	0
231	FTPTETNKAEQCCEETASSIS	PAp06954674	1	243	263	0.000205661	0	0	0	0	0	0	0	0	0	0	0	0
232	TPTETNKAEQCCEETASSISLHGK	PAp02138669	20	244	267	0.00411323	0	0	0	0	0	0	0	0	0	0	0	0
233	PTETNKAEQCCEETASSISLHGK	PAp00415838	327	245	267	0.0672513	0	0	0	0	0	0	0	0	0	0	0	0
234	TETNKAEQCCEETASSISLHGK	PAp02144957	3	246	267	0.000616984	0	0	0	0	0	0	0	0	0	0	0	0
235	ETNKAEQCCEETASSISLHGK	PAp06954659	3	247	267	0.000616984	0	0	0	0	0	0	0	0	0	0	0	0
236	TNKAEQCCEETASSISLHGK	PAp02139012	44	248	267	0.0090491	0	0	0	0	0	0	0	0	0	0	0	0
237	NKAEQCCEETASSISLHGK	PAp07809332	2	249	267	0.000411323	0	0	0	0	0	0	0	0	0	0	0	0
238	KAEQCCEETASSISLHGK	PAp00093133	112	250	267	0.0230341	0	0	0	0	0	0	0	0	0	0	0	0
239	KAEQCCEETASSISLHGKGSFR	PAp07797240	1	250	271	0.000205661	0	0	0	0	0	0	0	0	0	0	0	0
240	AEQCCEETASSISLHGK	PAp00024052	12289	251	267	2.52737	0	0	1	0.289855	1	0.30581	0	0	0	0	0	0
241	AEQCCEETASSISLHGKG	PAp01103118	621	251	268	0.127716	0	0	0	0	0	0	0	0	0	0	0	0
242	AEQCCEETASSISLH	PAp01511322	265	251	265	0.0545003	0	0	0	0	0	0	0	0	0	0	0	0
243	AEQCCEETASSISLHGKGSFR	PAp05683298	70	251	271	0.0143963	0	0	0	0	0	0	0	0	0	0	0	0
244	AEQCCEETASSISLHG	PAp04356369	29	251	266	0.00596418	0	0	0	0	0	0	0	0	0	0	0	0
245	AEQCCEETASSI	PAp01651828	1	251	262	0.000205661	0	0	0	0	0	0	0	0	0	0	0	0
246	AEQCCEETASSISL	PAp05690510	1	251	264	0.000205661	0	0	0	0	0	0	0	0	0	0	0	0
247	EQCCEETASSISLHGK	PAp02144603	23	252	267	0.00473021	0	0	0	0	0	0	0	0	0	0	0	0
248	QCCEETASSISLHGK	PAp02150394	11	253	267	0.00226228	0	0	0	0	0	0	0	0	0	0	0	0
249	CCEETASSISLHGK	PAp05688125	30	254	267	0.00616984	0	0	0	0	0	0	0	0	0	0	0	0
250	CEETASSISLHGK	PAp02130085	64	255	267	0.0131623	0	0	0	0	0	0	0	0	0	0	0	0
251	EETASSISLHGK	PAp02129737	27	256	267	0.00555286	0	0	0	0	0	0	0	0	0	0	0	0
252	ETASSISLHGK	PAp02144602	9	257	267	0.00185095	0	0	0	0	0	0	0	0	0	0	0	0
253	TASSISLHGK	PAp02138665	5	258	267	0.00102831	0	0	0	0	0	0	0	0	0	0	0	0
254	ASSISLHGK	PAp04704788	6	259	267	0.00123397	0	0	0	0	0	0	0	0	0	0	0	0
255	SISLHGK	PAp05688126	1	261	267	0.000205661	0	0	0	0	0	0	0	0	0	0	0	0
256	GSFRFSYSK	PAp05137397	7	268	276	0.00143963	0	0	0	0	0	0	0	0	0	0	0	0
257	FSYSKNETYQLFLSYSSK	PAp00025269	2	272	289	0.000411323	0	0	0	0	0	0	0	0	0	0	0	0
258	NETYQLFLSYSSK	PAp00556107	1	277	289	0.000205661	0	0	0	0	0	0	0	0	0	0	0	0
259	TYQLFLSYSSK	PAp07809732	1	279	289	0.000205661	0	0	0	0	0	0	0	0	0	0	0	0
260	QLFLSYSSK	PAp05682276	1	281	289	0.000205661	0	0	0	0	0	0	0	0	0	0	0	0
261	EKMFLHVK	PAp03578011	94	291	298	0.0193322	0	0	0	0	0	0	0	0	0	0	0	0
262	EKMFLHVKGEIHLGR	PAp02149043	30	291	305	0.00616984	0	0	0	0	0	0	0	0	0	0	0	0
263	MFLHVKGEIHLGR	PAp00608752	257	293	305	0.052855	0	0	0	0	0	0	0	0	0	0	0	0
264	MFLHVKG	PAp02127997	15	293	299	0.00308492	0	0	0	0	0	0	0	0	0	0	0	0
265	MFLHVK	NA_1	0	293	298	0	1	0.404858	3	0.869565	2	0.611621	1	0.409836	0	0	0	0	** This fragment were not in PeptideAtlas database (2022-01 edition)
266	FLHVKGEIHLGR	PAp02139050	7	294	305	0.00143963	0	0	0	0	0	0	0	0	0	0	0	0
267	GEIHLGR	PAp00092573	452	299	305	0.092959	0	0	0	0	0	0	0	0	0	0	0	0
268	GEIHLGRFVMR	NA_3	0	299	309	0	0	0	1	0.289855	0	0	0	0	0	0	0	0	** This fragment were not in PeptideAtlas database (2022-01 edition)
269	FVMRNRDVVLTTTFVDDIK	PAp02127951	31	306	324	0.0063755	0	0	0	0	0	0	0	0	0	0	0	0
270	MRNRDVVLTTTFVDDIK	PAp06954622	4	308	324	0.000822646	0	0	0	0	0	0	0	0	0	0	0	0
271	NRDVVLTTTFVDDIK	PAp00027097	27025	310	324	5.558	6	2.42915	8	2.31884	10	3.0581	7	2.86885	3	2.38095	4	3.0303
272	NRDVVLTTTFVD	PAp02127599	345	310	321	0.0709532	0	0	0	0	0	0	0	0	0	0	0	0
273	NRDVVLTTTFVDD	PAp02127545	307	310	322	0.0631381	0	0	0	0	0	0	0	0	0	0	0	0
274	NRDVVLTTTFVDDIKALPTTYEK	PAp01420663	50	310	332	0.0102831	1	0.404858	3	0.869565	5	1.52905	1	0.409836	0	0	1	0.757576
275	NRDVVLTTTF	PAp04489730	1	310	319	0.000205661	0	0	0	0	0	0	0	0	0	0	0	0
276	NRDVVLTTTFVDDIKALPTTY	PAp07802626	1	310	330	0.000205661	0	0	0	0	0	0	0	0	0	0	0	0
277	RDVVLTTTFVDDIK	PAp02128193	110	311	324	0.0226228	0	0	0	0	0	0	0	0	0	0	0	0
278	DVVLTTTFVDDIKALPTTYEK	PAp02150048	56	312	332	0.011517	4	1.61943	4	1.15942	3	0.917431	4	1.63934	1	0.793651	2	1.51515
279	DVVLTTTFVDDIKALPTTYEKG	PAp02128035	7	312	333	0.00143963	0	0	0	0	0	0	0	0	0	0	0	0
280	DVVLTTTF	PAp04498121	1	312	319	0.000205661	0	0	0	0	0	0	0	0	0	0	0	0
281	DVVLTTTFVDDIKA	PAp07804219	1	312	325	0.000205661	0	0	0	0	0	0	0	0	0	0	0	0
282	VVLTTTFVDDIK	PAp01706891	730	313	324	0.150133	0	0	0	0	0	0	0	0	0	0	0	0
283	VLTTTFVDDIK	PAp04710564	3	314	324	0.000616984	0	0	0	0	0	0	0	0	0	0	0	0
284	LTTTFVDDIK	PAp05690107	3	315	324	0.000616984	0	0	0	0	0	0	0	0	0	0	0	0
285	TTTFVDDIK	PAp05436495	28	316	324	0.00575852	0	0	0	0	0	0	0	0	0	0	0	0
286	TTFVDDIK	PAp05468939	8	317	324	0.00164529	0	0	0	0	0	0	0	0	0	0	0	0
287	TFVDDIK	PAp05435771	4	318	324	0.000822646	0	0	0	0	0	0	0	0	0	0	0	0
288	DVVLTTTFVDDIK	PAp00043912	17586	321	324	3.61676	20	8.09717	24	6.95652	14	4.28135	2	0.819672	3	2.38095	1	0.757576
289	KALPTTYEK	PAp05683911	4	324	332	0.000822646	0	0	0	0	0	0	0	0	0	0	0	0
290	ALPTTYEK	PAp00060105	2295	325	332	0.471993	0	0	0	0	0	0	0	0	0	0	0	0
291	ALPTTYEKGEYFAFLETYGTHYSSSGSLGGLYELIYVLDK	PAp01126565	792	325	364	0.162884	0	0	0	0	0	0	0	0	0	0	0	0
292	ALPTTYEKGEYFAFLETYGTHYSSSGSLGGLYELIYVLDKASMK	PAp02149032	121	325	368	0.024885	0	0	0	0	0	0	0	0	0	0	0	0
293	ALPTTYEKGEYFAFLETYG	PAp02127641	46	325	343	0.00946043	0	0	0	0	0	0	0	0	0	0	0	0
294	ALPTTYEKGEYFAFLETYGTHYSSSG	PAp06954546	31	325	350	0.0063755	0	0	0	0	0	0	0	0	0	0	0	0
295	ALPTTYEKG	PAp05681581	13	325	333	0.0026736	0	0	0	0	0	0	0	0	0	0	0	0
296	ALPTTYEKGEYFAFLETY	PAp02130226	11	325	342	0.00226228	0	0	0	0	0	0	0	0	0	0	0	0
297	ALPTTYEKGEYFAF	PAp02128146	10	325	338	0.00205661	0	0	0	0	0	0	0	0	0	0	0	0
298	ALPTTYEKGEYFAFLETYGTHYS	PAp06959076	9	325	347	0.00185095	0	0	0	0	0	0	0	0	0	0	0	0
299	ALPTTYEKGEYFAFLETYGTHY	PAp06954697	5	325	346	0.00102831	0	0	0	0	0	0	0	0	0	0	0	0
300	ALPTTYEKGEYFAFLETYGTHYSSS	PAp06959075	3	325	349	0.000616984	0	0	0	0	0	0	0	0	0	0	0	0
301	LPTTYEK	PAp04574362	3	326	332	0.000616984	0	0	0	0	0	0	0	0	0	0	0	0
302	GEYFAFLETYGTHYSSSGSLGGLYELIYVLDK	PAp00444976	1159	333	364	0.238362	0	0	0	0	0	0	0	0	0	0	0	0
303	GEYFAFLETYGTHY	PAp00092584	97	333	346	0.0199492	0	0	0	0	0	0	0	0	0	0	0	0
304	GEYFAFLETYGTHYS	PAp05683206	26	333	347	0.0053472	0	0	0	0	0	0	0	0	0	0	0	0
305	GEYFAFLETYGTHYSSSGSLGGLYELIYVLDKASMK	PAp02149049	21	333	368	0.00431889	0	0	0	0	0	0	0	0	0	0	0	0
306	GEYFAFLETYGTH	PAp00092583	19	333	345	0.00390757	0	0	0	0	0	0	0	0	0	0	0	0
307	GEYFAFLETYGTHYSSSG	PAp02128357	10	333	350	0.00205661	0	0	0	0	0	0	0	0	0	0	0	0
308	GEYFAFLETY	PAp00149035	9	333	342	0.00185095	0	0	0	0	0	0	0	0	0	0	0	0
309	GEYFAFLETYGTHYSSSGSLGGLYELIYVLDKASMKR	PAp02149047	7	333	369	0.00143963	0	0	0	0	0	0	0	0	0	0	0	0
310	GEYFAFLETYGTHYSS	PAp07802446	5	333	348	0.00102831	0	0	0	0	0	0	0	0	0	0	0	0
311	SSGSLGGLYELIYVLDKASMK	PAp07796791	2	333	339	0.000411323	0	0	0	0	0	0	0	0	0	0	0	0
312	GEYFAFLETYGTHYSSSGSLGGLY	PAp05690283	1	333	356	0.000205661	0	0	0	0	0	0	0	0	0	0	0	0
313	AFLETYGTHYSSSGSLGGLYELIYVLDK	PAp05436245	4	337	364	0.000822646	0	0	0	0	0	0	0	0	0	0	0	0
314	FLETYGTHYSSSGSLGGLYELIYVLDK	PAp07807145	12	338	364	0.00246794	0	0	0	0	0	0	0	0	0	0	0	0
315	LETYGTHYSSSGSLGGLYELIYVLDK	PAp00093301	9	339	364	0.00185095	0	0	0	0	0	0	0	0	0	0	0	0
316	TYGTHYSSSGSLGGLYELIYVLDK	PAp02144665	4	341	364	0.000822646	0	0	0	0	0	0	0	0	0	0	0	0
317	YGTHYSSSGSLGGLYELIYVLDK	PAp07807458	5	342	364	0.00102831	0	0	0	0	0	0	0	0	0	0	0	0
318	GTHYSSSGSLGGLYELIYVLDK	PAp00092775	41	343	364	0.00843212	0	0	0	0	0	0	0	0	0	0	0	0
319	THYSSSGSLGGLYELIYVLDK	PAp00143684	75	344	364	0.0154246	0	0	0	0	0	0	0	0	0	0	0	0
320	HYSSSGSLGGLYELIYVLDK	PAp06955663	20	345	364	0.00411323	0	0	0	0	0	0	0	0	0	0	0	0
321	YSSSGSLGGLYELIYVLDK	PAp00045966	41	346	364	0.00843212	0	0	0	0	0	0	0	0	0	0	0	0
322	SSSGSLGGLYELIYVLDK	PAp00045472	458	347	364	0.0941929	0	0	0	0	0	0	0	0	0	0	0	0
323	SSGSLGGLYELIYVLDK	PAp00094300	109	348	364	0.0224171	0	0	0	0	0	0	0	0	0	0	0	0
324	SSGSLGGLYELIYVLDKASMK	PAp07796791	1	348	368	0.000205661	0	0	0	0	0	0	0	0	0	0	0	0
325	SGSLGGLYELIYVLDK	PAp00060486	113	349	364	0.0232397	0	0	0	0	0	0	0	0	0	0	0	0
326	SGSLGGLYELIYVLDKASMK	PAp07796790	1	349	368	0.000205661	0	0	0	0	0	0	0	0	0	0	0	0
327	GSLGGLYELIYVLDK	PAp02144662	44	350	364	0.0090491	0	0	0	0	0	0	0	0	0	0	0	0
328	SLGGLYELIYVLDK	PAp00060501	324	351	364	0.0666343	0	0	0	0	0	0	0	0	0	0	0	0
329	LGGLYELIYVLDK	PAp02128340	42	352	364	0.00863778	0	0	0	0	0	0	0	0	0	0	0	0
330	GGLYELIYVLDK	PAp02128362	6	353	364	0.00123397	0	0	0	0	0	0	0	0	0	0	0	0
331	GLYELIYVLDK	PAp02128304	21	354	364	0.00431889	0	0	0	0	0	0	0	0	0	0	0	0
332	LYELIYVLDK	PAp02144661	3	355	364	0.000616984	0	0	0	0	0	0	0	0	0	0	0	0
333	YELIYVLDK	PAp08131010	12	356	364	0.00246794	0	0	0	0	0	0	0	0	0	0	0	0
334	ELIYVLDK	PAp05466367	3	357	364	0.000616984	0	0	0	0	0	0	0	0	0	0	0	0
335	KGVELKDIKR	PAp00139069	4	370	379	0.000822646	0	0	0	0	0	0	0	0	0	0	0	0
336	KGVELKDIK	PAp05683763	2	370	378	0.000411323	0	0	0	0	0	0	0	0	0	0	0	0
337	GVELKDIKR	PAp02127932	20	371	379	0.00411323	0	0	0	0	0	0	0	0	0	0	0	0
338	RCLGYHLDVSLAFSEISVGAEFNK	PAp04442254	102	379	402	0.0209775	0	0	0	0	0	0	0	0	0	0	0	0
339	RCLGYHLDVSLAFSEISVGAEFNKDDCVK	PAp02149013	71	379	407	0.014602	0	0	0	0	0	0	0	0	0	0	0	0
340	CLGYHLDVSLAFSEISVGAEFNKDDCVK	PAp00904653	7683	380	407	1.5801	0	0	0	0	0	0	0	0	0	0	0	0
341	CLGYHLDVSLAFSEISVGAEFNK	PAp01364031	3213	380	402	0.66079	0	0	0	0	0	0	0	0	0	0	0	0
342	CLGYHLDVSLAFSEISVGAEFNKDDCVKR	PAp02144581	115	380	408	0.0236511	0	0	0	0	0	0	0	0	0	0	0	0
343	CLGYHLDV	PAp07796396	2	380	387	0.000411323	0	0	0	0	0	0	0	0	0	0	0	0
344	CLGYHLDVSLAFS	PAp05689756	1	380	392	0.000205661	0	0	0	0	0	0	0	0	0	0	0	0
345	CLGYHLD	PAp02129227	1	380	386	0.000205661	0	0	0	0	0	0	0	0	0	0	0	0
346	HLDVSLAFSEISVGAEFNKDDCVK	PAp05436003	29	384	407	0.00596418	0	0	0	0	0	0	0	0	0	0	0	0
347	HLDVSLAFSEISVGAEFNK	PAp00092850	23	384	402	0.00473021	0	0	0	0	0	0	0	0	0	0	0	0
348	VSLAFSEISVGAEFNKDDCVK	PAp02128368	386	387	407	0.0793853	0	0	0	0	0	0	0	0	0	0	0	0
349	VSLAFSEISVGAEFNK	PAp02139022	12	387	402	0.00246794	0	0	0	0	0	0	0	0	0	0	0	0
350	VSLAFSEISVGAEFNKDDCVKR	PAp02139039	10	387	408	0.00205661	0	0	0	0	0	0	0	0	0	0	0	0
351	SLAFSEISVGAEFNKDDCVK	PAp07802572	1	388	407	0.000205661	0	0	0	0	0	0	0	0	0	0	0	0
352	LAFSEISVGAEFNKDDCVK	PAp05685312	8	389	407	0.00164529	0	0	0	0	0	0	0	0	0	0	0	0
353	LAFSEISVGAEFNK	PAp06394680	4	389	402	0.000822646	0	0	0	0	0	0	0	0	0	0	0	0
354	AFSEISVGAEFNKDDCVK	PAp06957499	3	390	407	0.000616984	0	0	0	0	0	0	0	0	0	0	0	0
355	AFSEISVGAEFNK	PAp06395063	3	390	402	0.000616984	0	0	0	0	0	0	0	0	0	0	0	0
356	FSEISVGAEFNK	PAp06394980	9	391	402	0.00185095	0	0	0	0	0	0	0	0	0	0	0	0
357	FSEISVGAEFNKDDCVK	PAp06392685	4	391	407	0.000822646	0	0	0	0	0	0	0	0	0	0	0	0
358	SEISVGAEFNKDDCVK	PAp01655671	95	392	407	0.0195378	0	0	0	0	0	0	0	0	0	0	0	0
359	SEISVGAEFNK	PAp04467416	14	392	402	0.00287926	0	0	0	0	0	0	0	0	0	0	0	0
360	EISVGAEFNKDDCVK	PAp02144726	9	393	407	0.00185095	0	0	0	0	0	0	0	0	0	0	0	0
361	ISVGAEFNKDDCVK	PAp06955185	1	394	407	0.000205661	0	0	0	0	0	0	0	0	0	0	0	0
362	VGAEFNKDDCVK	PAp06957557	2	396	407	0.000411323	0	0	0	0	0	0	0	0	0	0	0	0
363	GEGRAVNITSENLIDDVVSLIR	PAp06954686	13	409	430	0.0026736	0	0	0	0	0	0	0	0	0	0	0	0
364	AVNITSENLIDDVVSLIR	PAp00024309	545	413	430	0.112085	0	0	0	0	0	0	0	0	0	0	0	0
365	ITSENLIDDVVSLIR	PAp00556120	6	416	430	0.00123397	0	0	0	0	0	0	0	0	0	0	0	0
366	TSENLIDDVVSLIR	PAp00556173	6	417	430	0.00123397	0	0	0	0	0	0	0	0	0	0	0	0
367	SENLIDDVVSLIR	PAp01656435	30	418	430	0.00616984	0	0	0	0	0	0	0	0	0	0	0	0
368	NLIDDVVSLIR	PAp00093668	18	420	430	0.00370191	0	0	0	0	0	0	0	0	0	0	0	0
369	LIDDVVSLIR	PAp00093353	109	421	430	0.0224171	0	0	0	0	0	0	0	0	0	0	0	0
370	IDDVVSLIR	PAp00557100	4	422	430	0.000822646	0	0	0	0	0	0	0	0	0	0	0	0
371	KYAFELK	PAp00093215	3977	435	441	0.817916	3	1.21457	4	1.15942	5	1.52905	4	1.63934	3	2.38095	3	2.27273
372	KYAFELKEK	PAp00138240	501	435	443	0.103036	5	2.02429	9	2.6087	7	2.14067	5	2.04918	3	2.38095	3	2.27273
373	YAFELKEK	PAp01154449	136	436	443	0.02797	4	1.61943	5	1.44928	4	1.22324	5	2.04918	2	1.5873	3	2.27273
374	YAFELKEKLLR	PAp06957445	7	436	446	0.00143963	0	0	0	0	2	0.611621	0	0	0	0	0	0
375	YAFELK	NA_2	0	436	441	0	6	2.42915	7	2.02899	5	1.52905	4	1.63934	3	2.38095	3	2.27273	** This fragment were not in PeptideAtlas database (2022-01 edition)
376	EKLLRGTVIDVTDFVNWASSINDAPVLISQK	PAp06959143	6	442	472	0.00123397	0	0	0	0	0	0	0	0	0	0	0	0
377	LLRGTVIDVTDFVNWASSINDAPVLISQK	PAp02139047	382	444	472	0.0785627	0	0	0	0	0	0	0	0	0	0	0	0
378	LLRGTVIDVTDFVNWASSINDAPVLISQKLSPIYNLVPVK	PAp02144537	84	444	483	0.0172756	0	0	0	0	0	0	0	0	0	0	0	0
379	LLRGTVIDVTD	PAp07802859	1	444	454	0.000205661	0	0	0	0	0	0	0	0	0	0	0	0
380	LRGTVIDVTDFVNWASSINDAPVLISQK	PAp05480463	1	445	472	0.000205661	0	0	0	0	0	0	0	0	0	0	0	0
381	RGTVIDVTDFVNWASSINDAPVLISQK	PAp05685912	18	446	472	0.00370191	0	0	0	0	0	0	0	0	0	0	0	0
382	GTVIDVTDFVNWASSINDAPVLISQK	PAp00025585	27468	447	472	5.64911	7	2.83401	11	3.18841	10	3.0581	3	1.22951	4	3.1746	0	0
383	GTVIDVTDFVNWASSINDAPVLISQKLSPIYNLVPVK	PAp02139048	118	447	483	0.0242681	0	0	0	0	0	0	0	0	0	0	0	0
384	GTVIDVTDFVNWAS	PAp05277957	60	447	460	0.0123397	0	0	0	0	0	0	0	0	0	0	0	0
385	GTVIDVTDFVNWASSIND	PAp02149475	42	447	467	0.00863778	0	0	0	0	0	0	0	0	0	0	0	0
386	GTVIDVTDFVNWASSINDAPVLISQKLS	PAp05681546	19	447	474	0.00390757	0	0	0	0	0	0	0	0	0	0	0	0
387	GTVIDVTDFVNWASSIN	PAp05681544	5	447	463	0.00102831	0	0	0	0	0	0	0	0	0	0	0	0
388	GTVIDVTDFVNWASSINDAPVLISQKLSPIYNLVPVKMK	PAp06957497	4	447	485	0.000822646	0	0	0	0	0	0	0	0	0	0	0	0
389	GTVIDVTDFVNWASSINDAPVL	PAp05681558	3	447	468	0.000616984	0	0	0	0	0	0	0	0	0	0	0	0
390	GTVIDVTDFVNWA	PAp04539749	3	447	459	0.000616984	0	0	0	0	0	0	0	0	0	0	0	0
391	GTVIDVTDFVNW	PAp05683715	2	447	458	0.000411323	0	0	0	0	0	0	0	0	0	0	0	0
392	GTVIDVTDFVNWASSINDAPVLIS	PAp05688746	1	447	470	0.000205661	0	0	0	0	0	0	0	0	0	0	0	0
393	GTVIDVTDFVNWASSINDAPVLI	PAp05681895	1	447	469	0.000205661	0	0	0	0	0	0	0	0	0	0	0	0
394	GTVIDVTDFVNWASSINDAPVLISQKL	PAp05681881	1	447	473	0.000205661	0	0	0	0	0	0	0	0	0	0	0	0
395	GTVIDVTDFVNWASSINDAPVLISQ	PAp04590180	1	447	471	0.000205661	0	0	0	0	0	0	0	0	0	0	0	0
396	GTVIDVTDFVNWASSINDAPVLISQKLSPIYNL	PAp05682051	1	447	479	0.000205661	0	0	0	0	0	0	0	0	0	0	0	0
397	GTVIDVTDFVN	PAp05684771	1	447	457	0.000205661	0	0	0	0	0	0	0	0	0	0	0	0
398	TVIDVTDFVNWASSINDAPVLISQK	PAp05682190	10	448	472	0.00205661	0	0	0	0	0	0	0	0	0	0	0	0
399	VIDVTDFVNWASSINDAPVLISQK	PAp10499302	4	449	472	0.000822646	0	0	0	0	0	0	0	0	0	0	0	0
400	IDVTDFVNWASSINDAPVLISQK	PAp10436620	1	450	472	0.000205661	0	0	0	0	0	0	0	0	0	0	0	0
401	DVTDFVNWASSINDAPVLISQK	PAp06959099	1	451	472	0.000205661	0	0	0	0	0	0	0	0	0	0	0	0
402	VTDFVNWASSINDAPVLISQK	PAp02125244	45	452	472	0.00925477	0	0	0	0	0	0	0	0	0	0	0	0
403	TDFVNWASSINDAPVLISQK	PAp01658203	4	453	472	0.000822646	0	0	0	0	0	0	0	0	0	0	0	0
404	DFVNWASSINDAPVLISQK	PAp05480222	5	454	472	0.00102831	0	0	0	0	0	0	0	0	0	0	0	0
405	FVNWASSINDAPVLISQK	PAp02124642	153	455	472	0.0314662	0	0	0	0	0	0	0	0	0	0	0	0
406	VNWASSINDAPVLISQK	PAp04496413	8	456	472	0.00164529	0	0	0	0	0	0	0	0	0	0	0	0
407	NWASSINDAPVLISQK	PAp01653208	17	457	472	0.00349624	0	0	0	0	0	0	0	0	0	0	0	0
408	WASSINDAPVLISQK	PAp00094880	41	458	472	0.00843212	0	0	0	0	0	0	0	0	0	0	0	0
409	ASSINDAPVLISQK	PAp01101782	141	459	472	0.0289983	0	0	0	0	0	0	0	0	0	0	0	0
410	SSINDAPVLISQK	PAp00149006	50	460	472	0.0102831	0	0	0	0	0	0	0	0	0	0	0	0
411	SINDAPVLISQK	PAp00094168	288	461	472	0.0592305	0	0	0	0	0	0	0	0	0	0	0	0
412	INDAPVLISQK	PAp02139046	27	462	472	0.00555286	0	0	0	0	0	0	0	0	0	0	0	0
413	NDAPVLISQK	PAp07797936	2	463	472	0.000411323	0	0	0	0	0	0	0	0	0	0	0	0
414	DAPVLISQK	PAp01656804	32	464	472	0.00658117	0	0	0	0	0	0	0	0	0	0	0	0
415	APVLISQKLSPIYNLVPVK	PAp02144742	22	465	483	0.00452455	0	0	0	0	0	0	0	0	0	0	0	0
416	APVLISQKLSPIYNLVPVKMK	PAp02149153	11	465	485	0.00226228	0	0	0	0	0	0	0	0	0	0	0	0
417	PVLISQK	PAp05687953	1	466	472	0.000205661	0	0	0	0	0	0	0	0	0	0	0	0
418	VLISQKLSPIYNLVPVK	PAp07809831	1	467	483	0.000205661	0	0	0	0	0	0	0	0	0	0	0	0
419	ISQKLSPIYNLVPVK	PAp07161706	1	469	483	0.000205661	0	0	0	0	0	0	0	0	0	0	0	0
420	QKLSPIYNLVPVK	PAp02146350	8	471	483	0.00164529	0	0	0	0	0	0	0	0	0	0	0	0
421	KLSPIYNLVPVK	PAp00376531	34	472	483	0.00699249	0	0	0	0	0	0	0	0	0	0	0	0
422	LSPIYNLVPVK	PAp00026712	25865	473	483	5.31943	15	6.07287	20	5.7971	10	3.0581	8	3.27869	6	4.7619	6	4.54545
423	LSPIYNLVPVKMK	PAp00136332	158	473	485	0.0324945	0	0	0	0	3	0.917431	0	0	0	0	0	0
424	LSPIYNLVPV	PAp04474706	4	473	482	0.000822646	0	0	0	0	0	0	0	0	0	0	0	0
425	LSPIYNLVPVKM	PAp00445653	1	473	484	0.000205661	0	0	0	0	0	0	0	0	0	0	0	0
426	SPIYNLVPVK	PAp00375251	210	474	483	0.0431889	0	0	0	0	0	0	0	0	0	0	0	0
427	PIYNLVPVK	PAp00093818	1288	475	483	0.264892	0	0	0	0	0	0	0	0	0	0	0	0
428	IYNLVPVK	PAp04519183	20	476	483	0.00411323	0	0	0	0	0	0	0	0	0	0	0	0
429	NAHLKKQNLER	PAp00138582	8	486	496	0.00164529	0	0	0	0	0	0	0	0	0	0	0	0
430	KQNLERAIEDYINEFSVR	PAp06394611	1	491	508	0.000205661	0	0	0	0	0	0	0	0	0	0	0	0
431	QNLERAIEDYINEFSVR	Sigma_3	1	492	508	0	0	0	0	0	0	0	0	0	0	0	0	0	*We found this peptide during C9 (Sigma) MS analysis. This frament was missing from PeptideAtlas database (2022-01 version)
432	QNLERAIEDYINEFSVRK	PAp05137466	15	492	509	0.00308492	0	0	0	0	0	0	0	0	0	0	0	0
433	ERAIEDYINEFSVR	PAp06394610	1	495	508	0.000205661	0	0	0	0	0	0	0	0	0	0	0	0
434	RAIEDYINEFSVR	PAp07800176	6	496	508	0.00123397	0	0	0	0	0	0	0	0	0	0	0	0
435	AIEDYINEFSVR	PAp00024110	26987	497	508	5.55019	7	2.83401	14	4.05797	13	3.97554	6	2.45902	4	3.1746	5	3.78788
436	AIEDYINEFSVRK	PAp00136291	5407	497	509	1.11201	4	1.61943	5	1.44928	4	1.22324	3	1.22951	3	2.38095	3	2.27273
437	AIEDYINEF	PAp02663838	60	497	505	0.0123397	0	0	0	0	0	0	0	0	0	0	0	0
438	AIEDYINEFSV	PAp04475379	2	497	507	0.000411323	0	0	0	0	0	0	0	0	0	0	0	0
439	AIEDYIN	PAp02663795	1	497	503	0.000205661	0	0	0	0	0	0	0	0	0	0	0	0
440	IEDYINEFSVR	PAp00375253	51	498	508	0.0104887	0	0	0	0	0	0	0	0	0	0	0	0
441	IEDYINEFSVRK	PAp04387501	2	498	509	0.000411323	0	0	0	0	0	0	0	0	0	0	0	0
442	EDYINEFSVR	PAp02121427	121	499	508	0.024885	0	0	0	0	0	0	0	0	0	0	0	0
443	EDYINEFSVRK	PAp02127926	2	499	509	0.000411323	0	0	0	0	0	0	0	0	0	0	0	0
444	DYINEFSVR	PAp03646774	23	500	508	0.00473021	0	0	0	0	0	0	0	0	0	0	0	0
445	YINEFSVR	PAp03340259	28	501	508	0.00575852	0	0	0	0	0	0	0	0	0	0	0	0
446	INEFSVR	PAp05436671	1	502	508	0.000205661	0	0	0	0	0	0	0	0	0	0	0	0
447	KCHTCQNGGTVILMDGK	PAp00044540	1048	509	525	0.215533	0	0	0	0	0	0	0	0	0	0	0	0
448	KCHTCQNGGTVILMDGKCLCACPFK	PAp03394020	9	509	533	0.00185095	0	0	0	0	0	0	0	0	0	0	0	0
449	KCHTCQNGGTVILMDGKC	PAp05689353	2	509	526	0.000411323	0	0	0	0	0	0	0	0	0	0	0	0
450	CHTCQNGGTVILMDGK	PAp00556239	1038	510	525	0.213477	0	0	0	0	0	0	0	0	0	0	0	0
451	CHTCQNGGTVILMDGKC	PAp04495490	544	510	526	0.11188	0	0	0	0	0	0	0	0	0	0	0	0
452	CHTCQNGGTVILMDGKCL	PAp07796386	15	510	527	0.00308492	0	0	0	0	0	0	0	0	0	0	0	0
453	CHTCQNGGTVILMDGKCLCACPFK	PAp07797402	3	510	533	0.000616984	0	0	0	0	0	0	0	0	0	0	0	0
454	CHTCQNGGTVILMDGKCLCACPFKF	PAp07803518	1	510	534	0.000205661	0	0	0	0	0	0	0	0	0	0	0	0
455	HTCQNGGTVILMDGK	PAp10276835	29	511	525	0.00596418	0	0	0	0	0	0	0	0	0	0	0	0
456	CQNGGTVILMDGK	PAp06531107	4	513	525	0.000822646	0	0	0	0	0	0	0	0	0	0	0	0
457	GGTVILMDGK	PAp03263735	2	516	525	0.000411323	0	0	0	0	0	0	0	0	0	0	0	0
458	CLCACPFKFEGIACEISK	PAp00377859	36767	526	543	7.56155	0	0	0	0	0	0	0	0	0	0	0	0
459	CLCACPFK	PAp00378655	3584	526	533	0.737091	0	0	0	0	0	0	0	0	0	0	0	0
460	CLCACPFKFEGIACEISKQK	PAp02144551	84	526	545	0.0172756	0	0	0	0	0	0	0	0	0	0	0	0
461	CLCACPFKF	PAp02128157	18	526	534	0.00370191	0	0	0	0	0	0	0	0	0	0	0	0
462	CLCACPFKFEGIACEISKQ	PAp02128271	14	526	544	0.00287926	0	0	0	0	0	0	0	0	0	0	0	0
463	CLCACPF	PAp03101092	13	526	532	0.0026736	0	0	0	0	0	0	0	0	0	0	0	0
464	CLCACPFKFEGIAC	PAp02130227	7	526	539	0.00143963	0	0	0	0	0	0	0	0	0	0	0	0
465	CLCACPFKFEG	PAp06954658	1	526	536	0.000205661	0	0	0	0	0	0	0	0	0	0	0	0
466	CLCACPFKFEGIA	PAp02138879	1	526	538	0.000205661	0	0	0	0	0	0	0	0	0	0	0	0
467	LCACPFK	PAp04549891	1	527	533	0.000205661	0	0	0	0	0	0	0	0	0	0	0	0
468	CACPFKFEGIACEISK	PAp02128134	27	528	543	0.00555286	0	0	0	0	0	0	0	0	0	0	0	0
469	CPFKFEGIACEISK	PAp04620425	1	530	543	0.000205661	0	0	0	0	0	0	0	0	0	0	0	0
470	PFKFEGIACEISK	PAp02144585	6	531	543	0.00123397	0	0	0	0	0	0	0	0	0	0	0	0
471	KFEGIACEISK	PAp01128468	712	533	543	0.146431	0	0	0	0	0	0	0	0	0	0	0	0
472	FEGIACEISK	PAp00044100	5854	534	543	1.20394	0	0	0	0	0	0	0	0	0	0	0	0
473	FEGIACEIS	PAp04502994	1	534	542	0.000205661	0	0	0	0	0	0	0	0	0	0	0	0
474	EGIACEISK	PAp02144733	1	535	543	0.000205661	0	0	0	0	0	0	0	0	0	0	0	0
475	FEGIACEISKQK	PAp03331792	5	543	545	0.00102831	0	0	0	0	0	0	0	0	0	0	0	0
476	FEGIACEISKQ	PAp05684417	4	543	544	0.000822646	0	0	0	0	0	0	0	0	0	0	0	0
477	QKISEGLPALEFPNE	PAp00445651	11018	544	558	2.26598	0	0	0	0	0	0	0	0	0	0	0	0
478	QKISEGLPALEFPNEK	PAp02127924	1214	544	559	0.249673	0	0	0	0	0	0	0	0	0	0	0	0
479	QKISEGLPALEFPN	PAp01154366	955	544	557	0.196407	0	0	0	0	0	0	0	0	0	0	0	0
480	QKISEGLPALEF	PAp06955168	1	544	555	0.000205661	0	0	0	0	0	0	0	0	0	0	0	0
481	KISEGLPALEFPNEK	PAp07796192	1	545	559	0.000205661	0	0	0	0	0	0	0	0	0	0	0	0
482	ISEGLPALEFPNE	PAp00035047	4968	546	558	1.02173	0	0	0	0	0	0	0	0	0	0	0	0
483	ISEGLPALEFPNEK	PAp00093069	1404	546	559	0.288749	3	1.21457	3	0.869565	6	1.83486	5	2.04918	4	3.1746	0	0
484	ISEGLPALEFPN	PAp00375342	167	546	557	0.0343455	0	0	0	0	0	0	0	0	0	0	0	0
485	ISEGLPALEFP	PAp02667886	21	546	556	0.00431889	0	0	0	0	0	0	0	0	0	0	0	0
486	ISEGLPAL	PAp05684276	3	546	553	0.000616984	0	0	0	0	0	0	0	0	0	0	0	0
487	PALEFPNEK	PAp05687929	3	551	559	0.000616984	0	0	0	0	0	0	0	0	0	0	0	0

## Sheet: workflow desciption
	1.	PeptideAtlas (https://peptideatlas.org/) C9 fragments database were created
	2.	Fragments were ordered based on their start amino acid position
	3.	Every fragment in the ordered list were indexed based on their position in the list
	4.	Complement C9 fragments were collected from MS results and compared to PeptideAtlas databse
	5.	% of peptide counts were calculated
