# Supplementary material for: Epitomics: Analysis of Plasma C9 Epitope Heterogeneity in the Plasma of Lung Cancer Patients and Control Subjects
Source: Int J Mol Sci. 2023 Sep 21;24(18):14359. doi: 10.3390/ijms241814359 (PMC10531758; doi:10.3390/ijms241814359)
Supplement: Supplementary file 1 [file ijms-24-14359-s001.zip › Tornyi et al. SupplementaryTable 4.xlsx]

## Sheet: Munka1
Acc #	Gene
P04406	GAPDH
P0C0L4	C4A
P01591	JCHAIN
P01024	C3
P14923	JUP
P06702	S100A9
Q5T749	KPRP
P03952	KLKB1
Q8N1N4	KRT78
O95678	KRT75
P15924	DSP
P16157	ANK1
P04114	APOB
Q8IZA0	KIAA0319L
O95810	CAVIN2
P06396	GSN
O14950	MYL12B
O60814	HIST1H2BK
P35611	ADD1
P02746	C1QB
P00450	CP
Q92692	NECTIN2
P01602	IGKV1-5
P06312	IGKV4-1
Q02487	DSC2
Q6UX06	OLFM4
Q01518	CAP1
P30740	SERPINB1
P35030	PRSS3
P28289	TMOD1
Q86Y46	KRT73
P05089	ARG1
P01009	SERPINA1
Q02413	DSG1
A0A0B4J1V0	IGHV3-15
P02671	FGA
P04433	IGKV3-11
P02760	AMBP
P0DOX4
P04004	VTN
P11171	EPB41
P01624	IGKV3-15
P13645	KRT10
P0DOX5
P01619	IGKV3-20
P0CF74	IGLC6
P01871	IGHM
P02675	FGB
P01834	IGKC
P02649	APOE
P01614	IGKV2D-40
P12259	F5
P01876	IGHA1
P04264	KRT1
P02679	FGG
P02549	SPTA1
P01042	KNG1
P02768	ALB
P01593	IGKV1D-33
P11277	SPTB
P35579	MYH9
P35527	KRT9
P04196	HRG
P02747	C1QC
P32119	PRDX2
P07996	THBS1
Q08495	DMTN
P01762	IGHV3-11
P60660	MYL6
P21333	FLNA
P01599	IGKV1-17
Q86YZ3	HRNR
P80748	IGLV3-21
P11142	HSPA8
Q9BX67	JAM3
P02730	SLC4A1
P01764	IGHV3-23
P08238	HSP90AB1
